# Supplementary material for: Differentially Altered Metabolic Pathways in the Amygdala of Subjects with Schizophrenia, Bipolar Disorder and Major Depressive Disorder
Source: bioRxiv or medRxiv preprint supplement (doi:10.1101/2024.04.17.24305854), 2024-04-19
Supplement: Supplementary file [file media-3.pdf]

Supplementary Figures

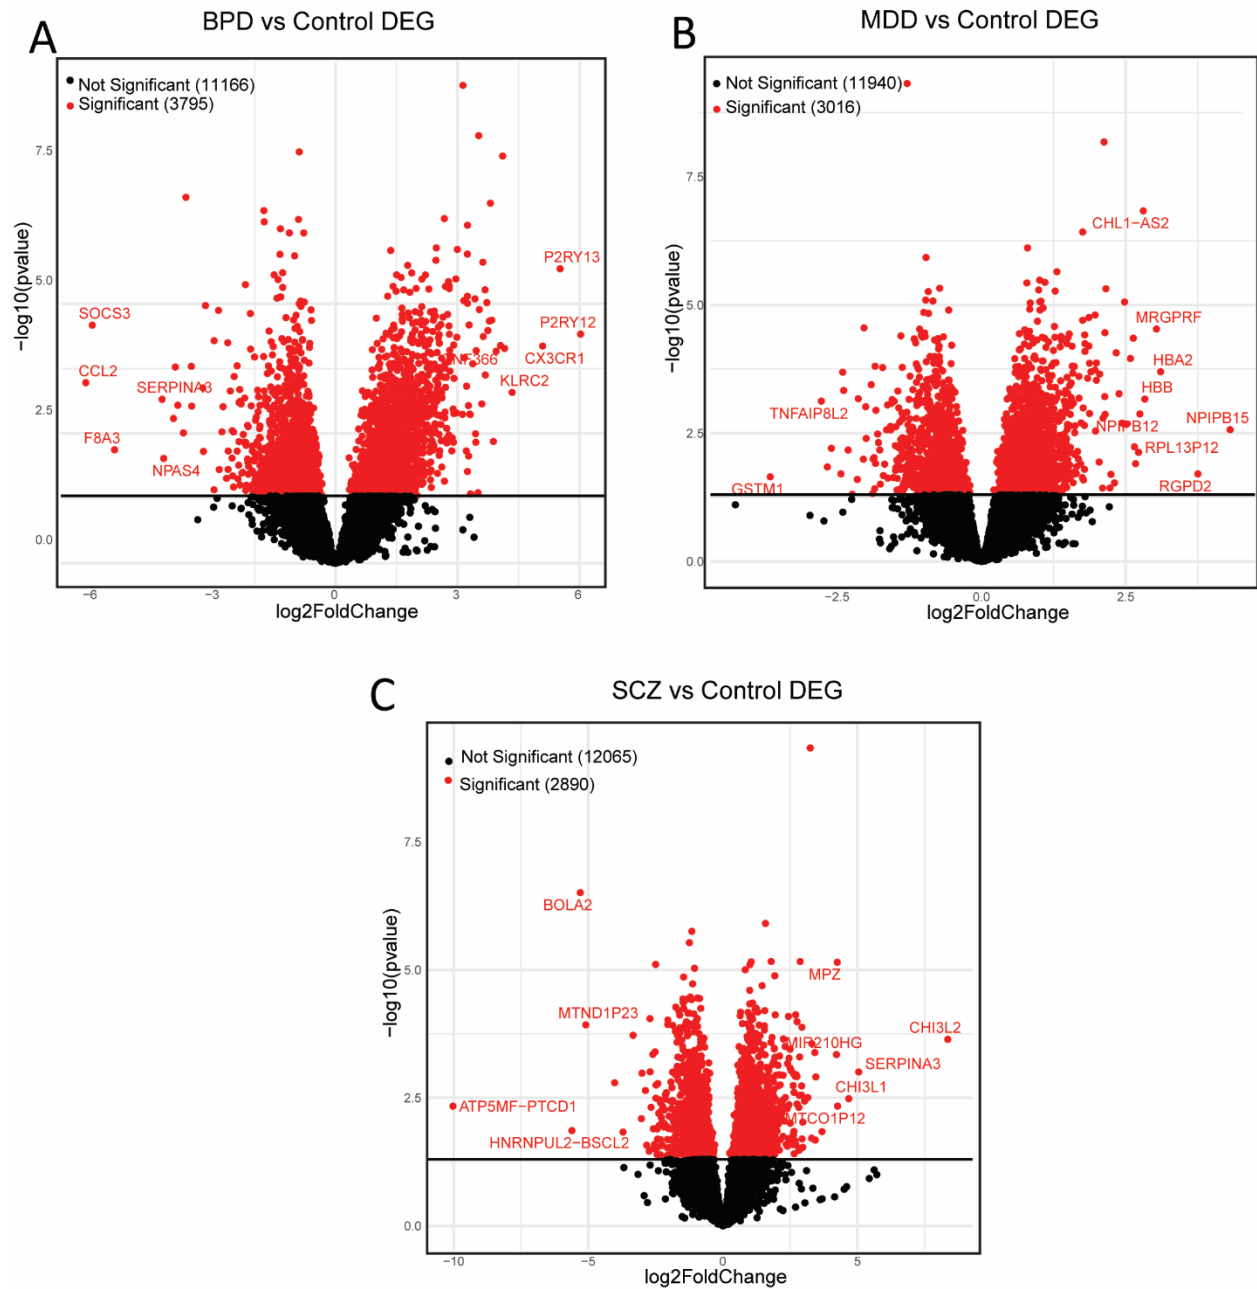

**Fig S1. Volcano Plot.** Volcano plot of  $-\log_{10}(\text{p-value})$  (y-axis) and  $\log_2$  fold change (x-axis) of differentially expressed gene transcripts in BPD (A), MDD (B) and SCZ (C). Significant genes are indicated by red dots, above the horizontal line indicating significance threshold ( $-\log_{10}(\text{p}<0.05)$ ). Top differentially expressed genes (DEGs) are named on each figure. BPD bipolar disorder, MDD major depressive disorder, SCZ schizophrenia.

Figure S2

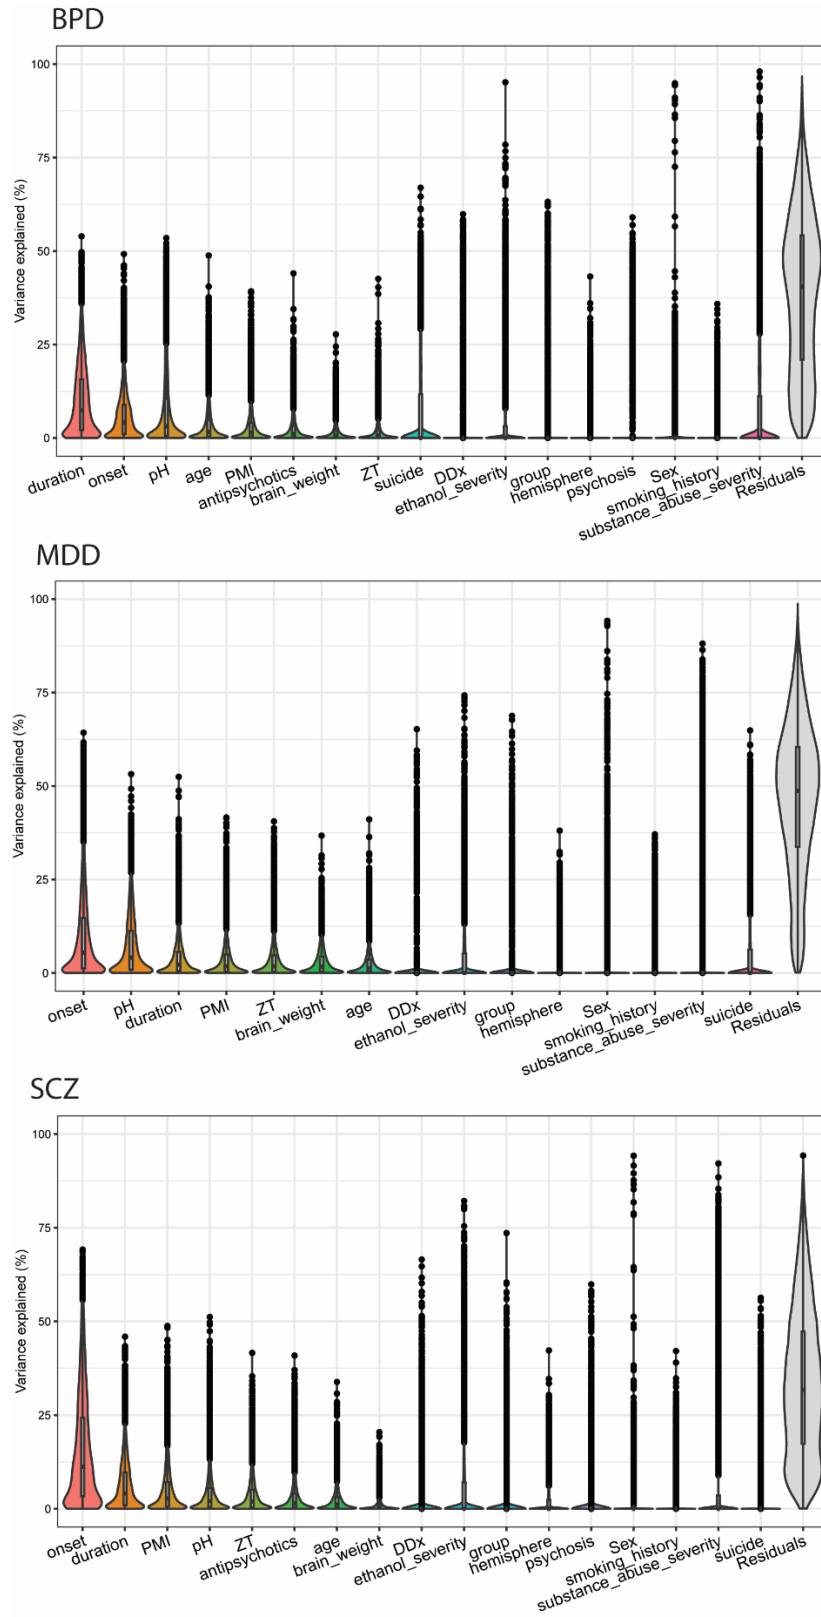

**Fig S2. Variance partitioning analysis.** Violin plots of all covariates (x-axis), ranked by percentage (%) variance explained (y-axis) for BPD, MDD and SCZ. The top 2 covariates were included as covariates in generalized linear regression model analyses for all disease comparisons. BPD bipolar disorder, DDx diagnosis, MDD major depressive disorder, PMI postmortem interval, SCZ schizophrenia, ZT zeitgeber time.

**Figure S3**

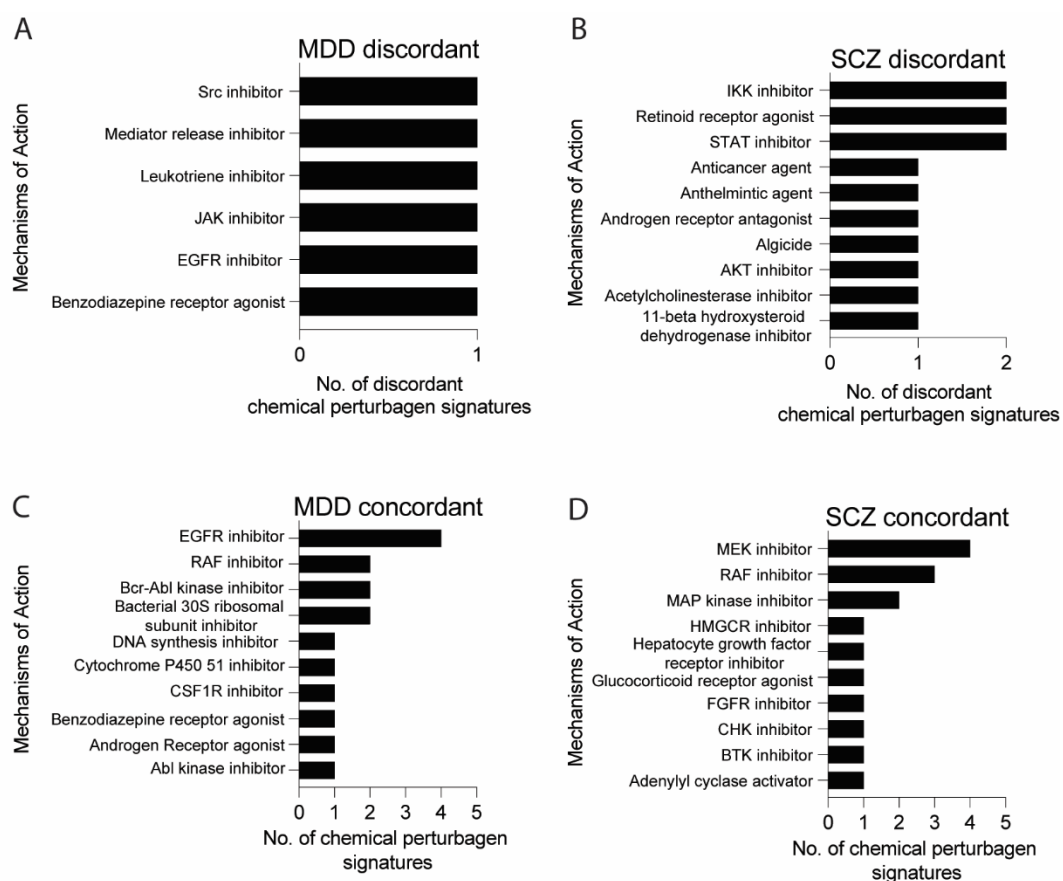

**Fig S3. LINC analysis MDD and SCZ.** The mechanisms of action (MOA) of the chemical perturbagens with LINC signatures that are discordant (dissimilar) to the MDD (A) and SCZ (B) disease signatures or concordant (similar) to the MDD (C) and SCZ (D) disease signatures. MDD major depressive disorder, MOA mechanism of action, SCZ schizophrenia.

**Figure S4**

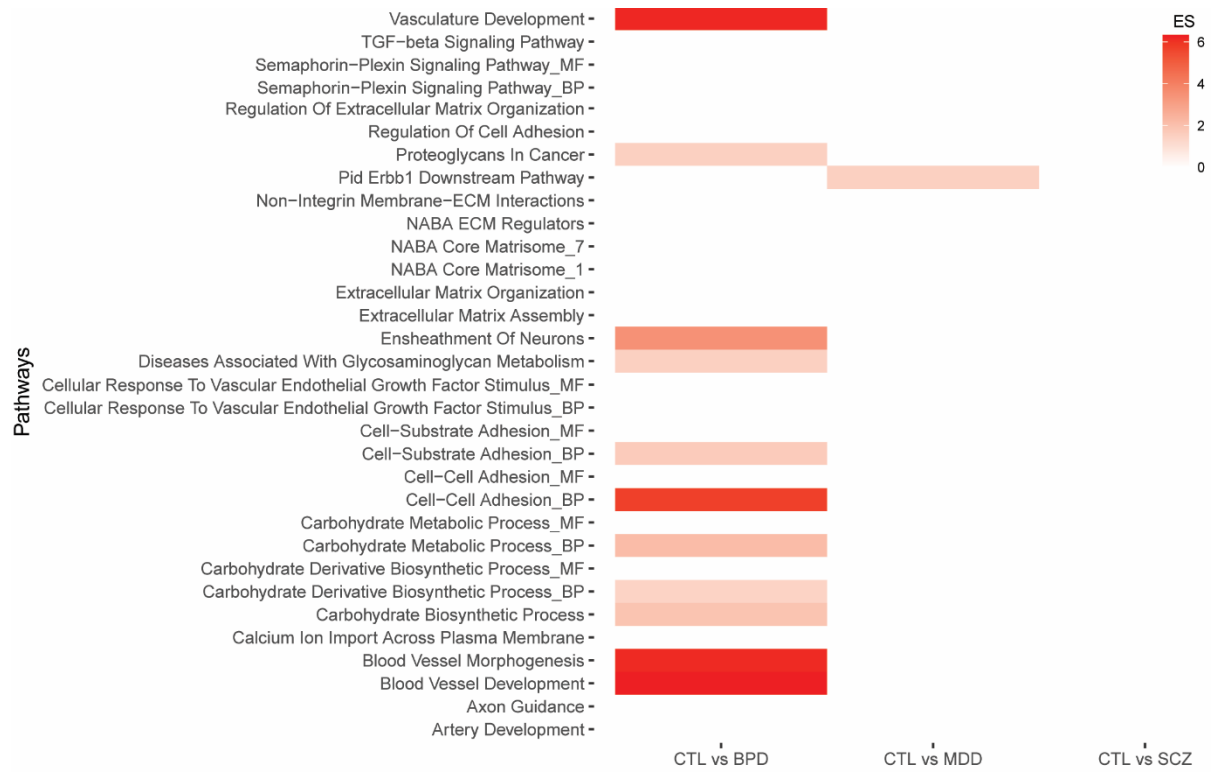

**Fig S4. Heatmap overlap.** Hypergeometric overlap analysis of metabolic genesets and amygdala transcriptional profiles from BPD, MDD and SCZ.

Figure S5

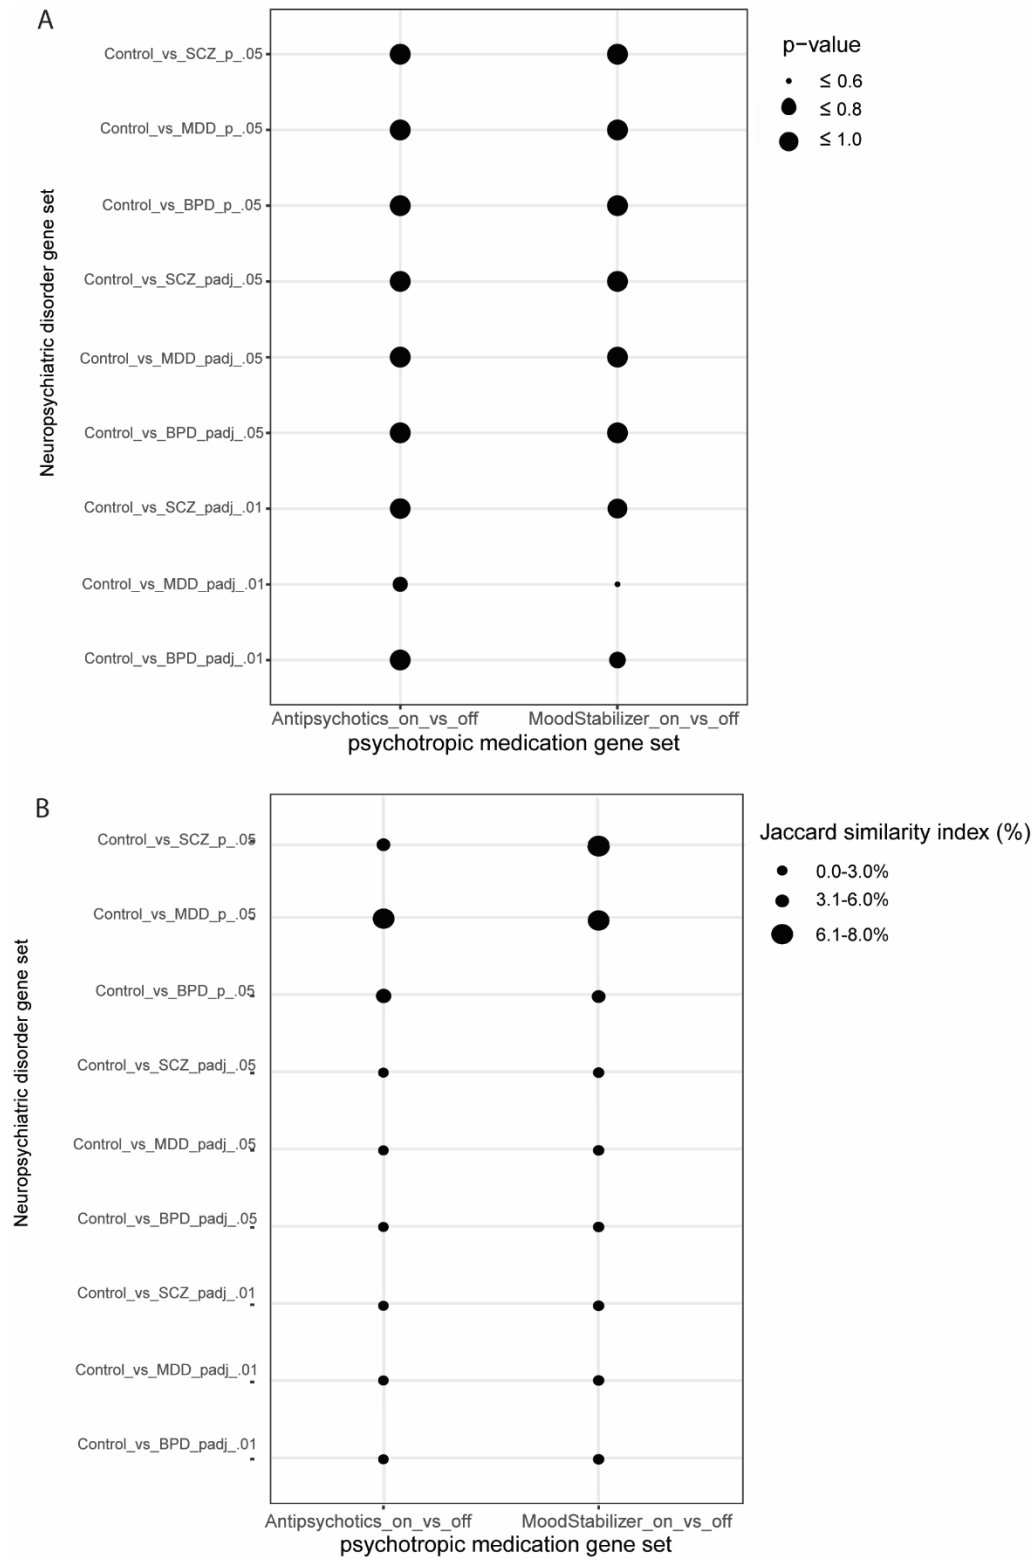

**Fig S5. Psychotropic medication gene set enrichment. (A)** Hypergeometric overlap analysis found no significant overlap ( $p > 0.05$  all comparisons) of BPD, MDD and SCZ DEGs

(psychiatric disorder gene sets composed of DEGs at  $FDR < 0.01$ ,  $FDR < 0.05$ , and  $p\text{-value} < 0.05$ ) and DEGs ( $p < 0.05$ ) from subjects who were on v off antipsychotics or on v off mood stabilizers at time of death (obtained from the Stanley Medical Research Institute Online Genomics Database). **(B)** The Jaccard similarity index, which calculates the similarity of two gene sets ranging from 0 - 100%, was also generated for the same datasets. No significant overlap of DEGs altered in on/off medication datasets were found using either approach.
